# Supplementary material for: Synthesis and Antimicrobial Resistant Modulatory Activity of 2,4-Dinitrophenylhydrazone Derivatives as Agents against Some ESKAPE Human Pathogens
Source: Hindawi journal article supplement (doi:10.1155/2020/2720697), 2020-10-07

# Synthesis and antimicrobial resistant modulatory activity of 2,4-dinitrophenylhydrazone derivatives.

*Alberta Ade<sup>1</sup>, Cedric D.K Amengor<sup>2</sup> Abena Brobbey<sup>1\*</sup>, Isaac Ayensu<sup>1</sup>, Benjamin K. Harley<sup>2</sup> and Yaw Duah-Boakye<sup>3</sup>*

<sup>1</sup>Department of Pharmaceutical Chemistry, Faculty of Pharmacy and Pharmaceutical Sciences, Kwame Nkrumah University of Science and Technology, Kumasi-Ghana.

<sup>2</sup>Department of Pharmaceutical Chemistry, School of Pharmacy, University of Health and Allied Sciences, Ho-Ghana

<sup>3</sup>Department of Pharmaceutics, Faculty of Pharmacy and Pharmaceutical Sciences, Kwame Nkrumah University of Science and Technology, Kumasi-Ghana.

## SUPPORTING INFORMATION

### TABLE OF CONTENT

|                                            |   |
|--------------------------------------------|---|
| 1H NMR SPECTRUM of BP1 (compound 1).....   | 2 |
| 13C NMR SPECTRUM of BP1 (compound 1).....  | 3 |
| 1. FTIR SPECTRUM OF BP1.....               | 3 |
| a. UV-Vis SPECTRUM OF BP1.....             | 3 |
| 1H NMR SPECTRUM OF BA2 (compound 2).....   | 4 |
| 13C NMR SPECTRUM OF BA2 (compound 2).....  | 5 |
| 2. FTIR SPECTRUM OF BA2.....               | 5 |
| a. UV-Vis SPECTRUM OF BA2.....             | 6 |
| 1H NMR SPECTRUM OF MHB3 (compound 3).....  | 6 |
| 13C NMR SPECTRUM OF MHB3 (compound 3)..... | 7 |
| 3. FTRIR SPECTRUM OF MHB3.....             | 7 |

|                                            |    |
|--------------------------------------------|----|
| a. UV-Vis SPECTRUM OF MHB3.....            | 8  |
| 1H NMR SPECTRUM OF VL4 (compound 4).....   | 8  |
| 13C NMR SPECTRUM OF VL4 (compound 4).....  | 9  |
| 4. FTIR SPECTRUM OF VL4.....               | 10 |
| a. UV-Vis SPECTRUM OF VL4.....             | 10 |
| 1H NMR SPECTRUM OF SA5 (compound 5).....   | 11 |
| 13C NMR SPECTRUM OF SA5 (compound 5).....  | 12 |
| 5. FTIR SPECTRUM OF SA5.....               | 12 |
| a. UV-Vis SPECTRUM OF SA5.....             | 13 |
| 1H NMR SPECTRUM OF DBH6 (compound 6).....  | 13 |
| 13C NMR SPECTRUM OF DBH6 (compound 6)..... | 14 |
| 6. FTIR SPECTRUM OF DBH6.....              | 14 |
| a. UV-Vis SPECTRUM OF DBH6.....            | 15 |

### 1H NMR SPECTRUM of BP1 (compound 1)

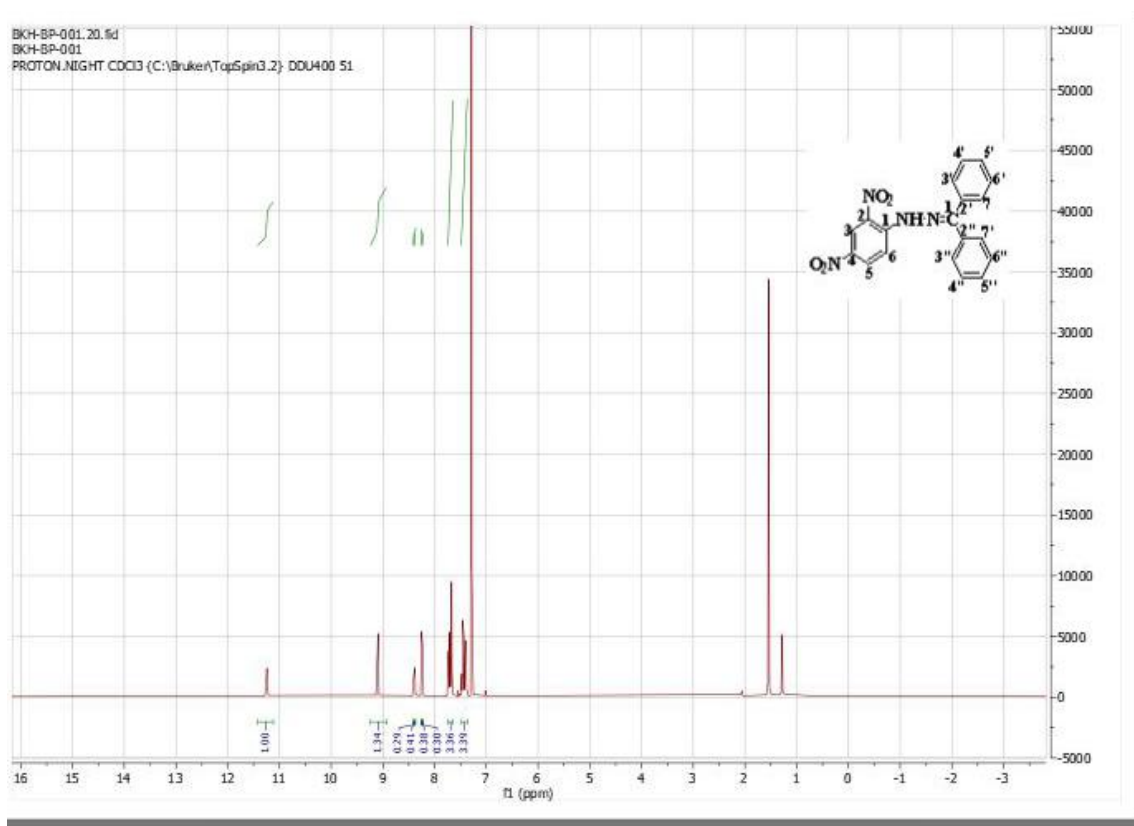

# <sup>13</sup>C NMR SPECTRUM of BP1 (compound 1)

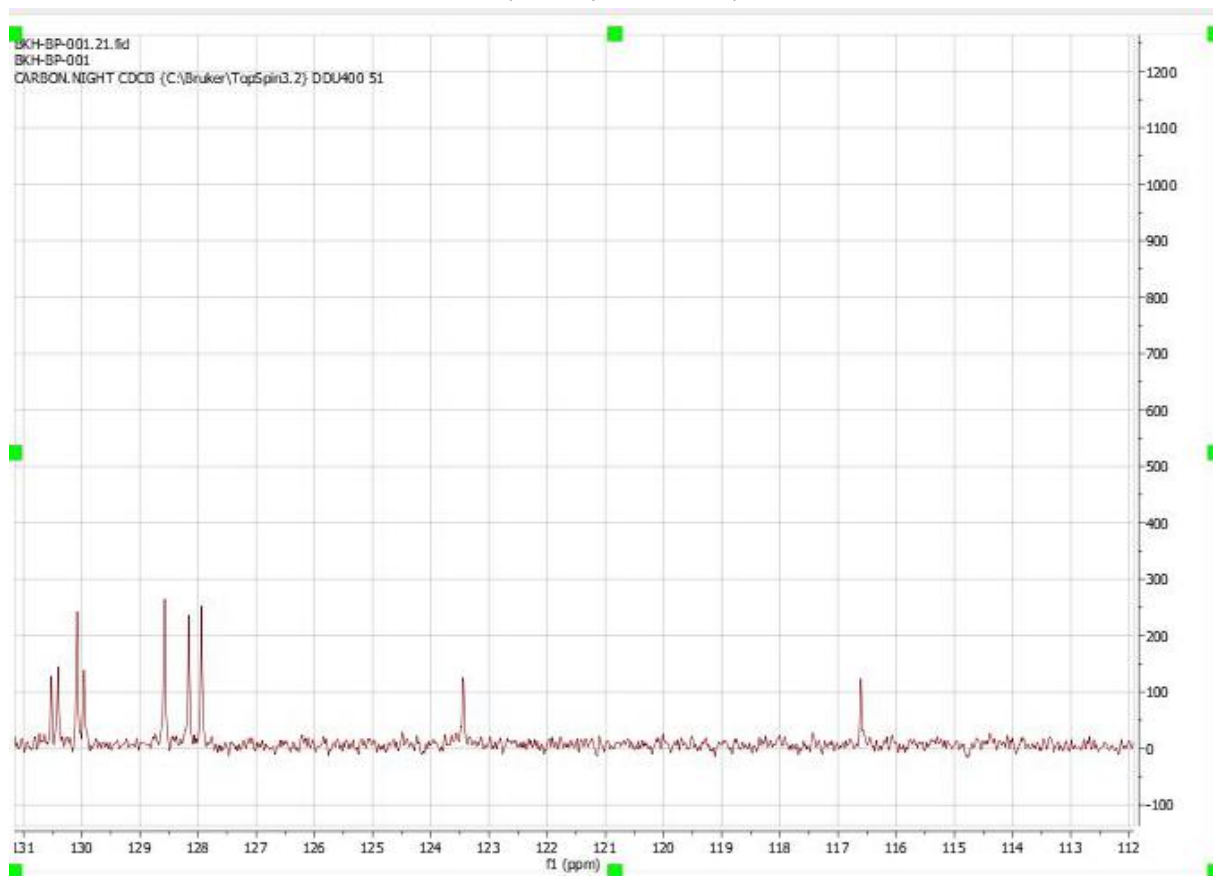

## 1. FTIR SPECTRUM OF BP1

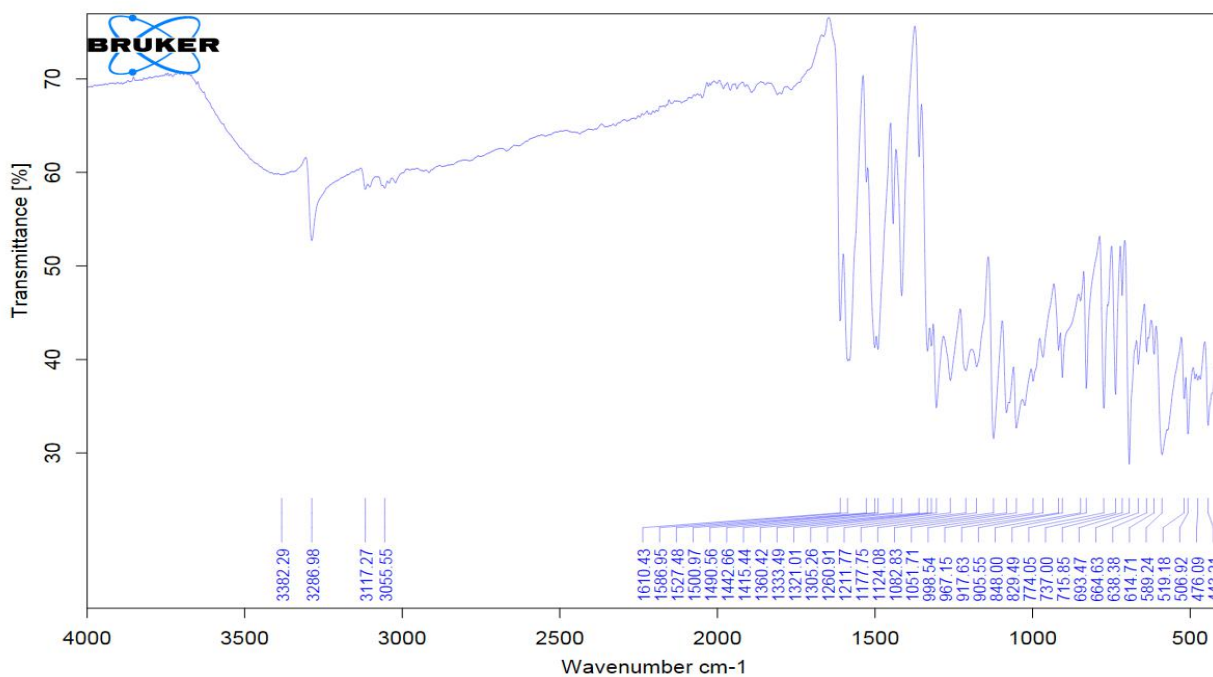

## a. UV-Vis SPECTRUM OF BP1

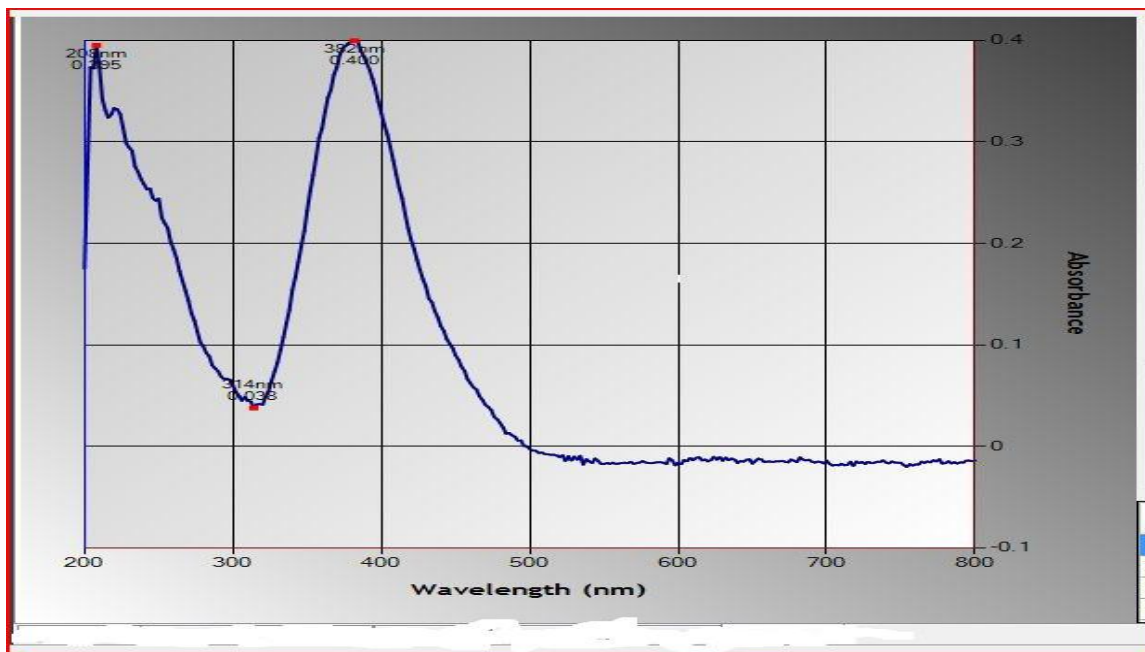

### **<sup>1</sup>H NMR SPECTRUM OF BA2 (compound 2)**

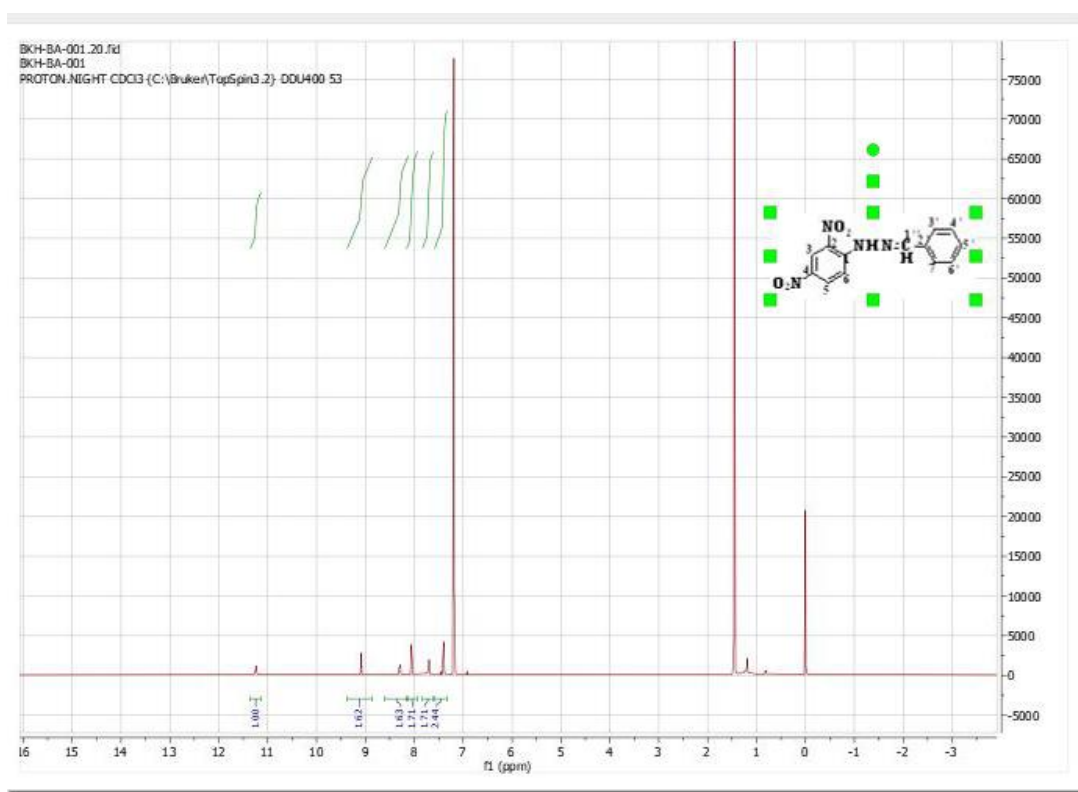

## 13C NMR SPECTRUM OF BA2 (compound 2)

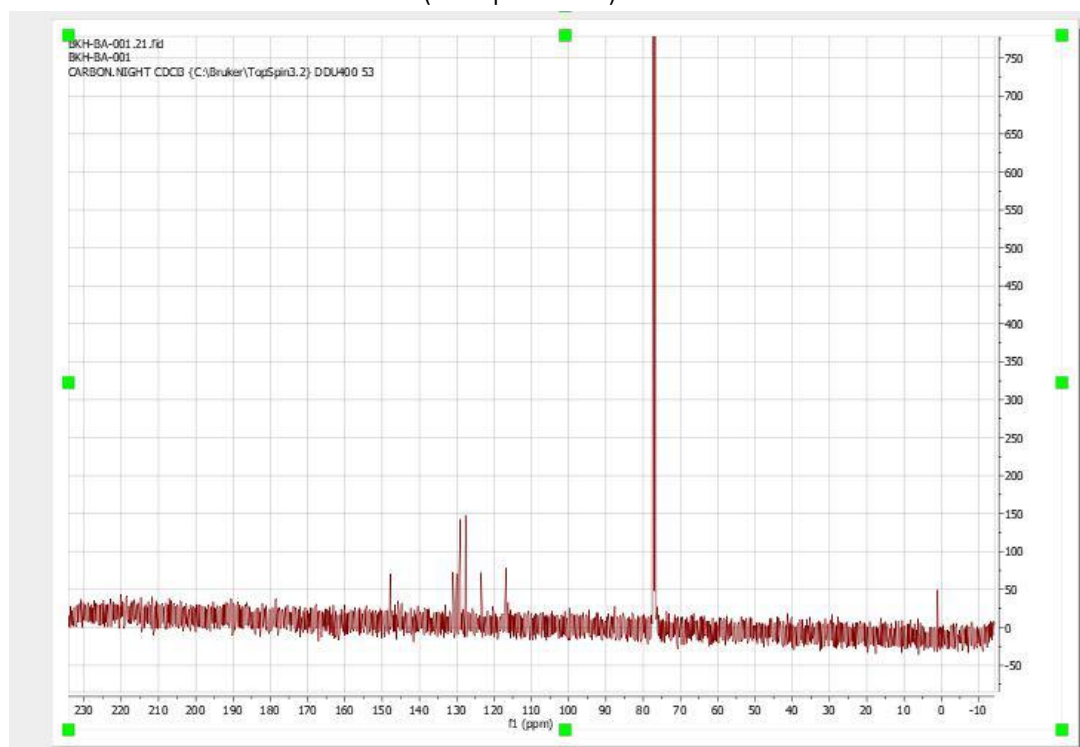

## 2. FTIR SPECTRUM OF BA2

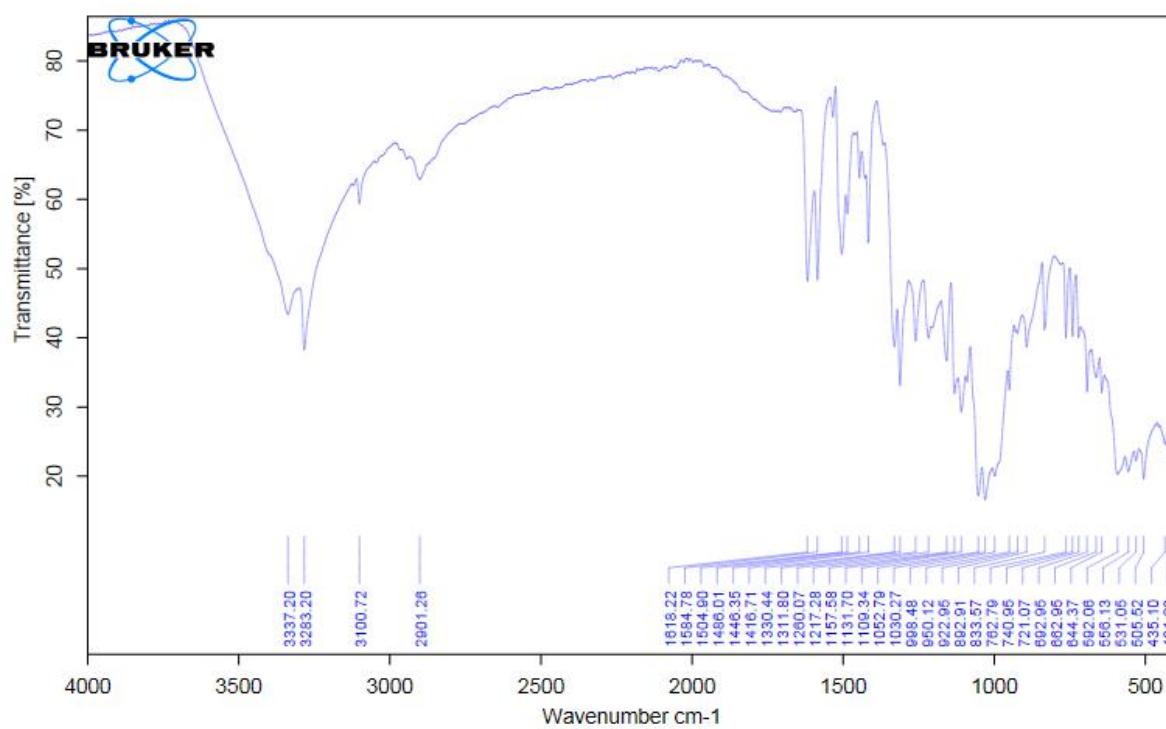

### a. UV-Vis SPECTRUM OF BA2

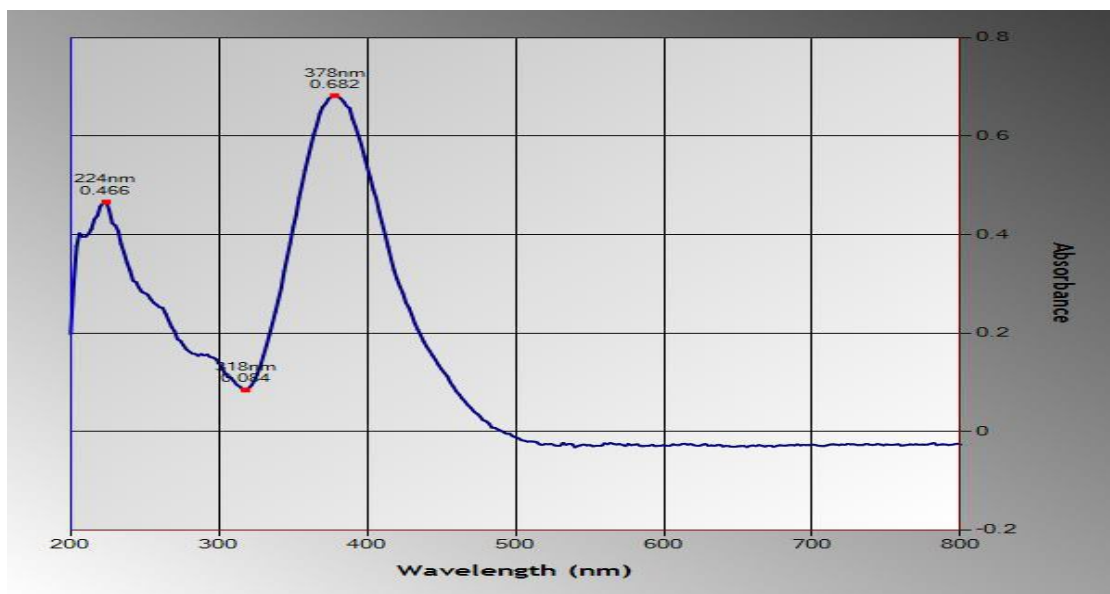

### <sup>1</sup>H NMR SPECTRUM OF MHB3 (compound 3)

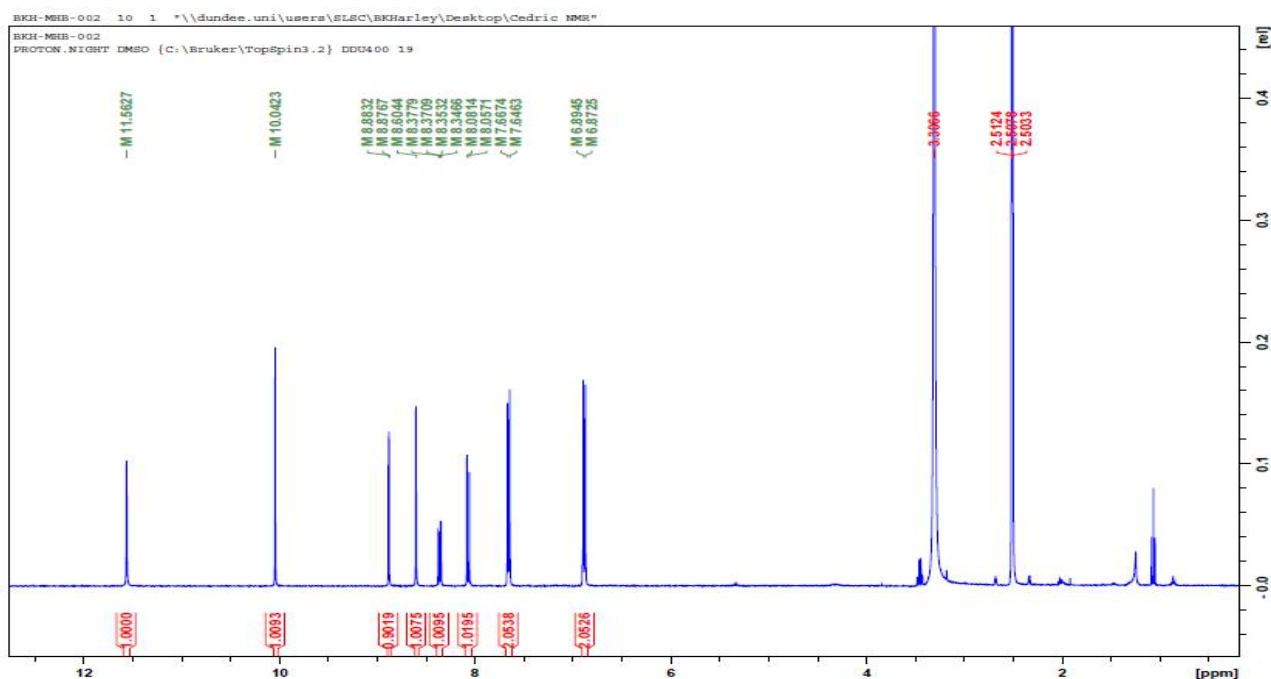

### 13C NMR SPECTRUM OF MHB3 (compound 3)

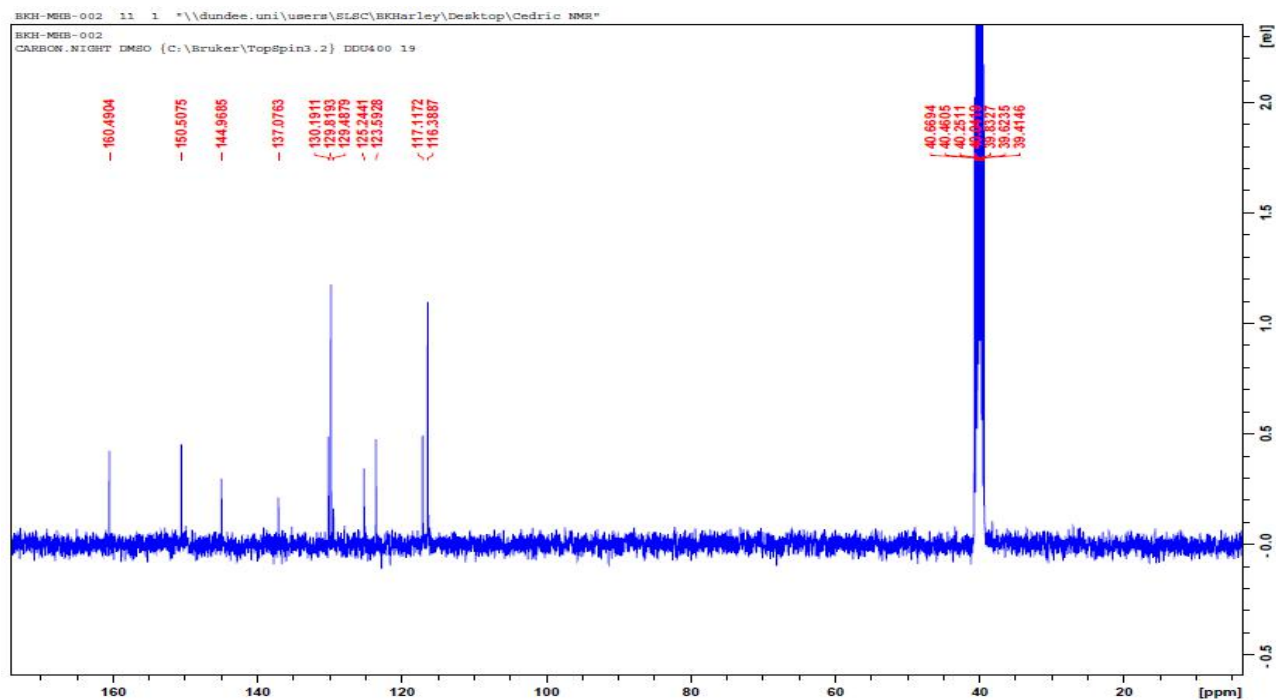

### 3. FTIR SPECTRUM OF MHB3

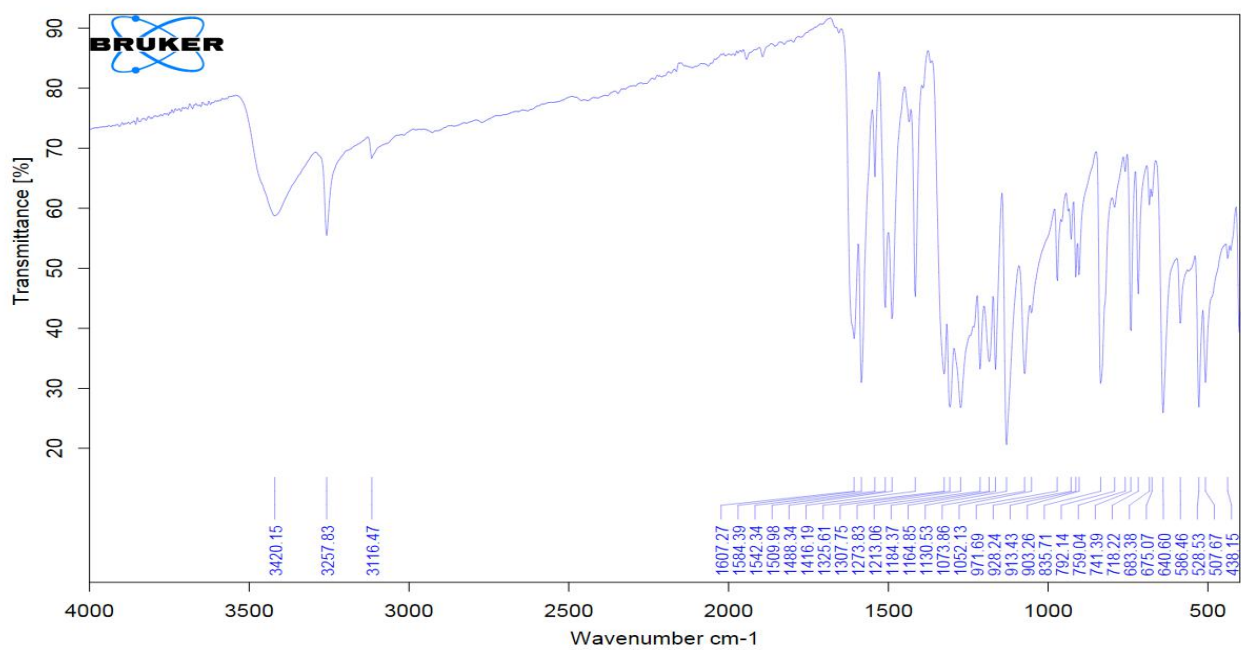

**a. UV-Vis SPECTRUM OF MHB3**

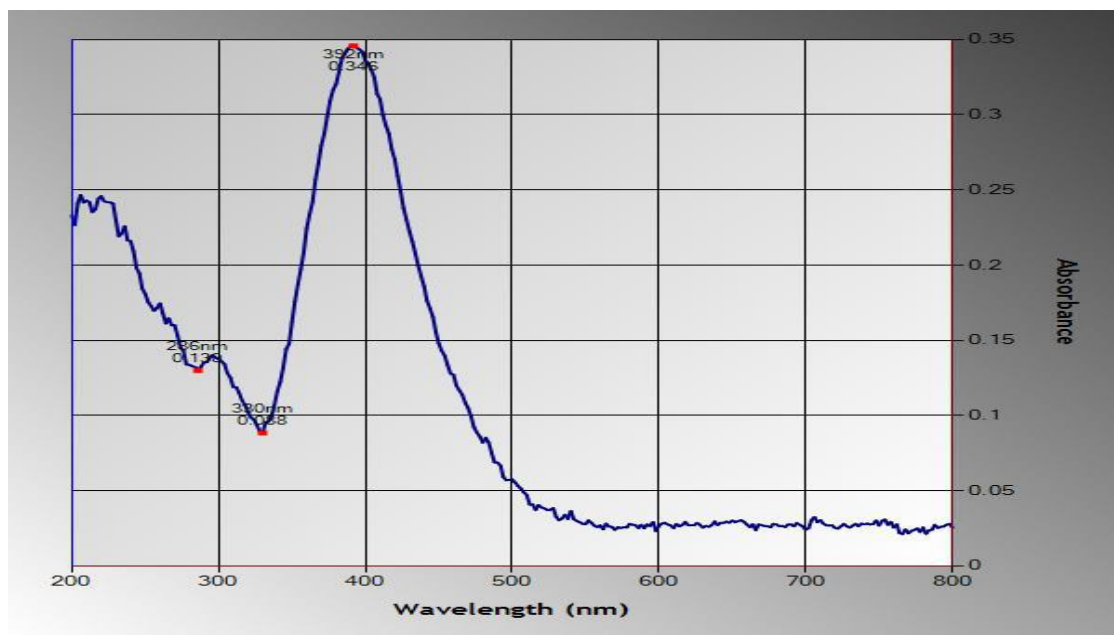

**<sup>1</sup>H NMR SPECTRUM OF VL4 (compound 4)**



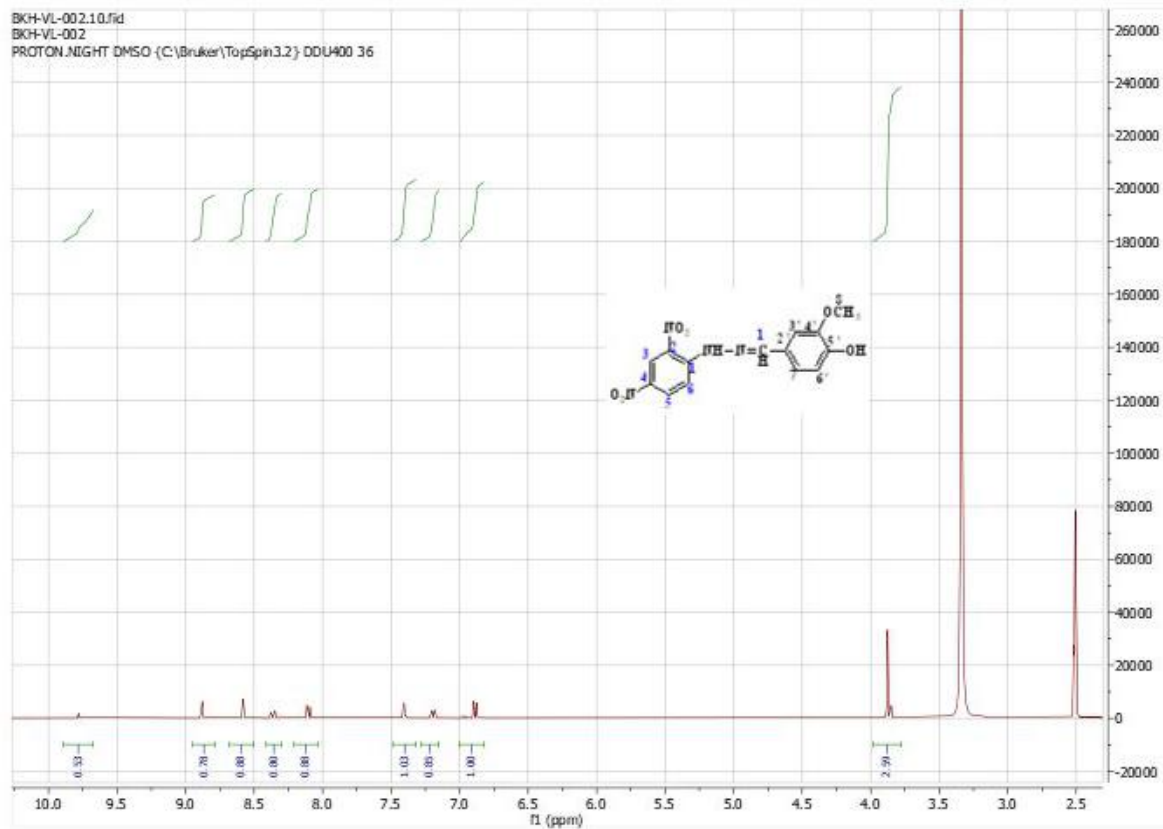

13C NMR SPECTRUM OF VL4 (compound 4)

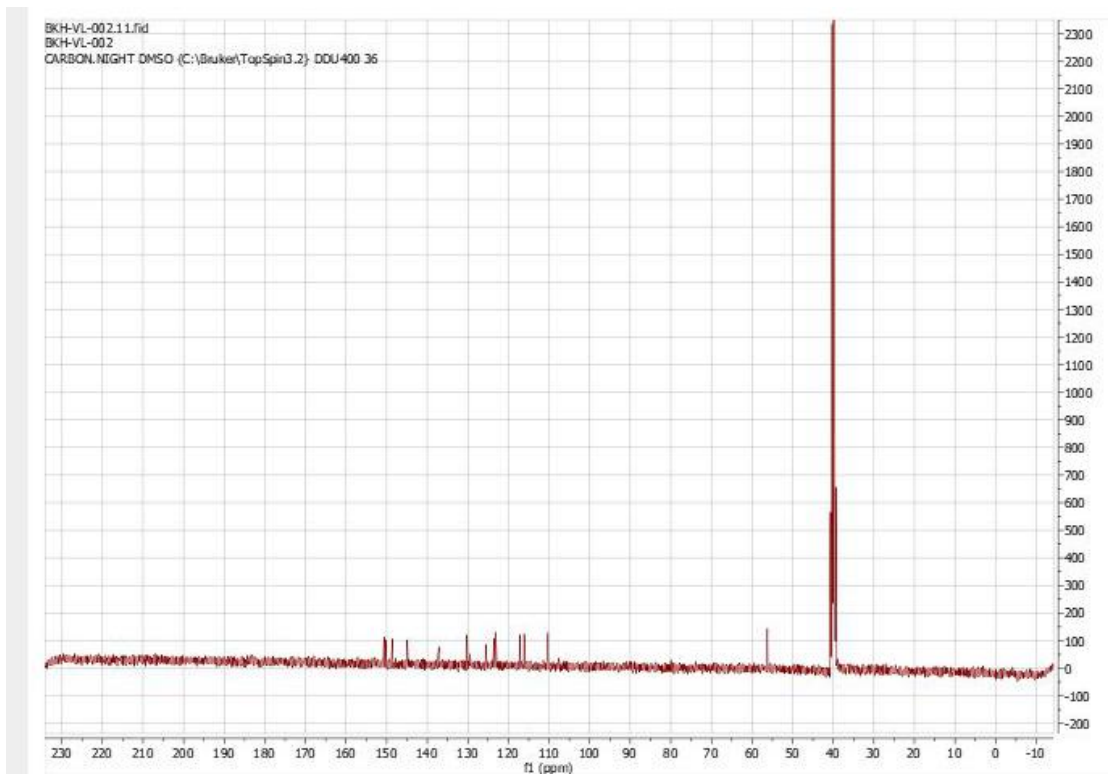

## 4. FTIR SPECTRUM OF VL4

### a. UV-Vis SPECTRUM OF VL4

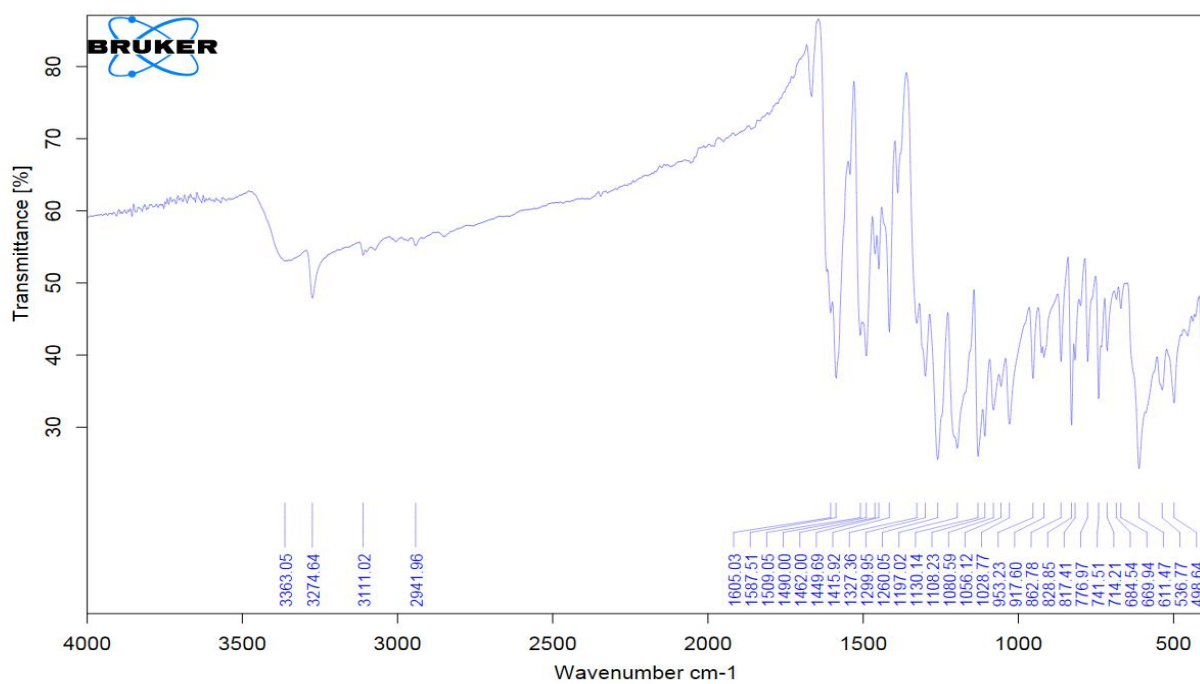

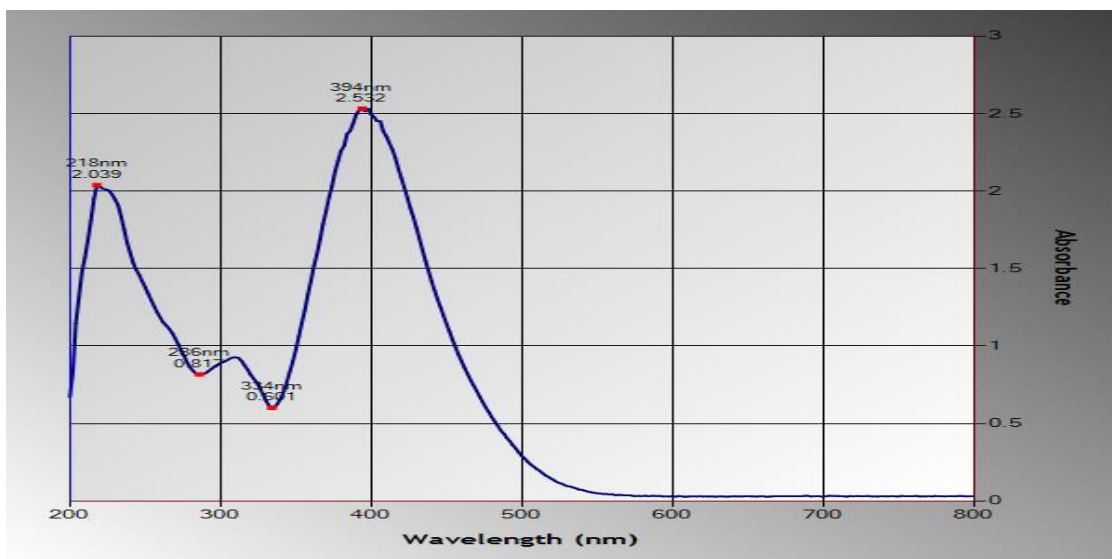

### **1H NMR SPECTRUM OF SA5 (compound 5)**

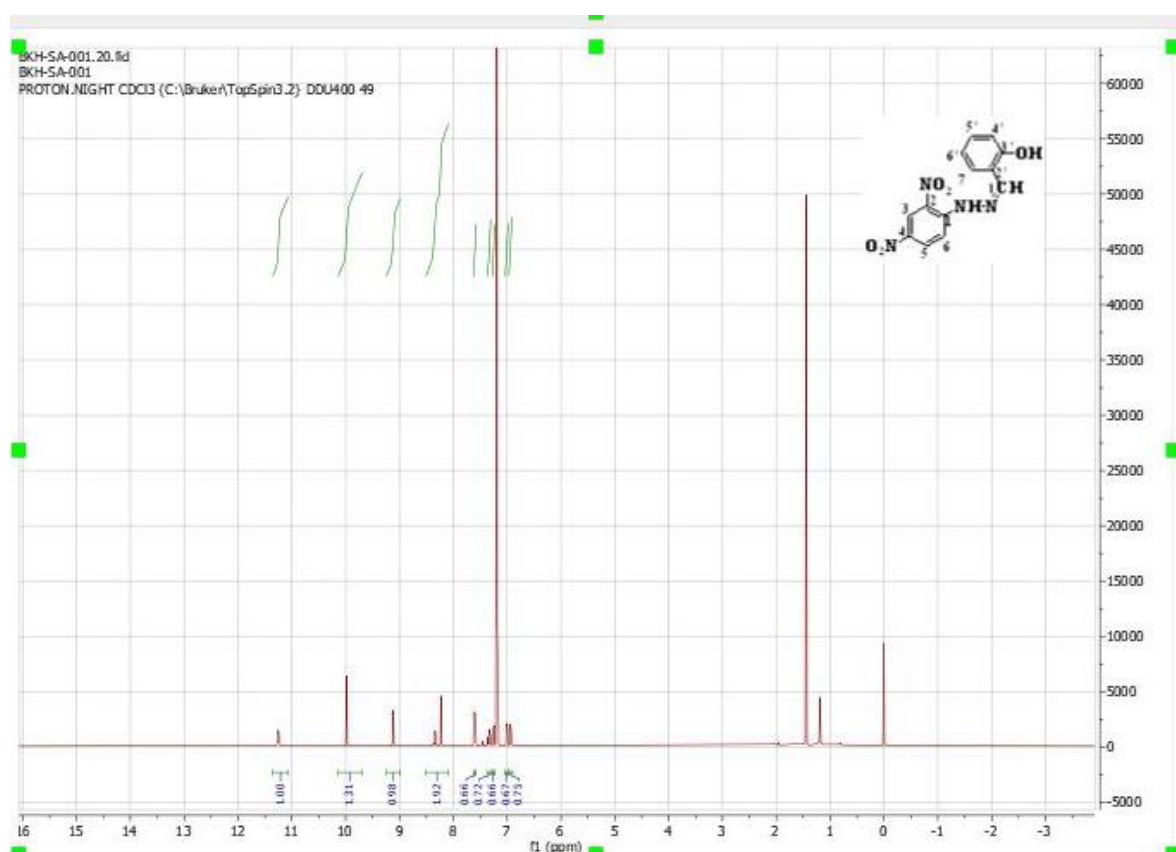

## 13C NMR SPECTRUM OF SA5 (compound 5)

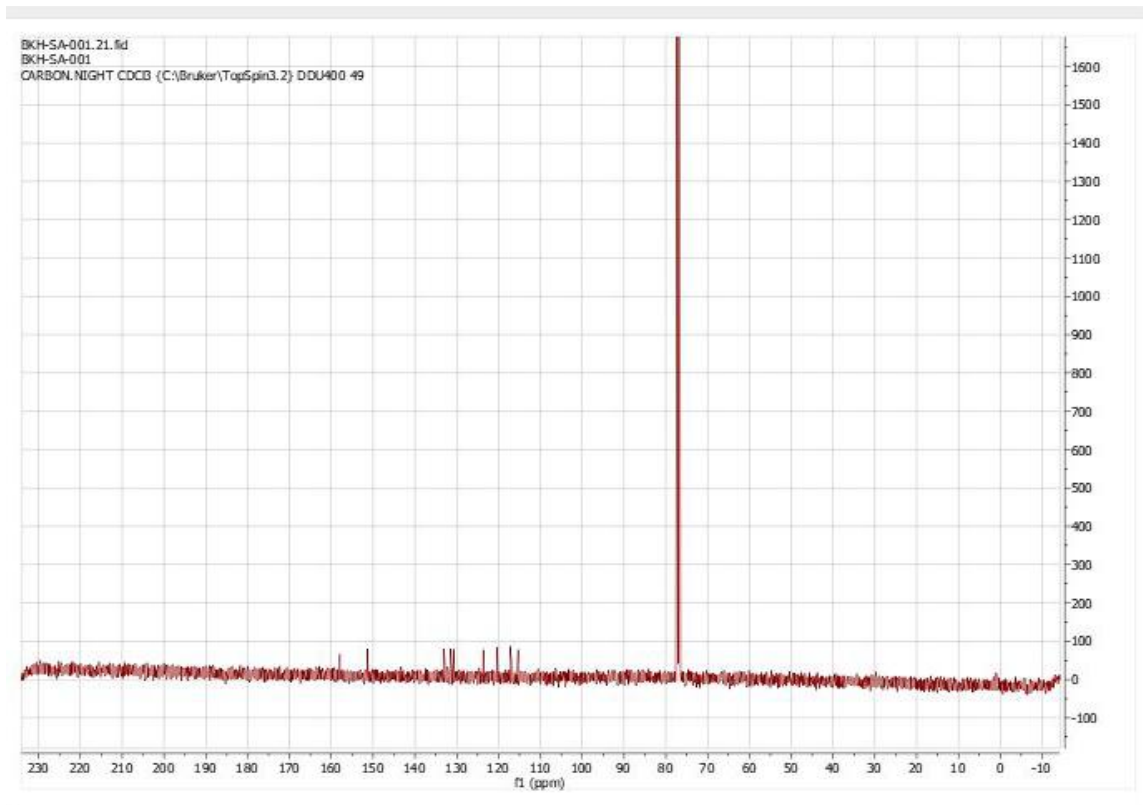

## 5. FTIR SPECTRUM OF SA5

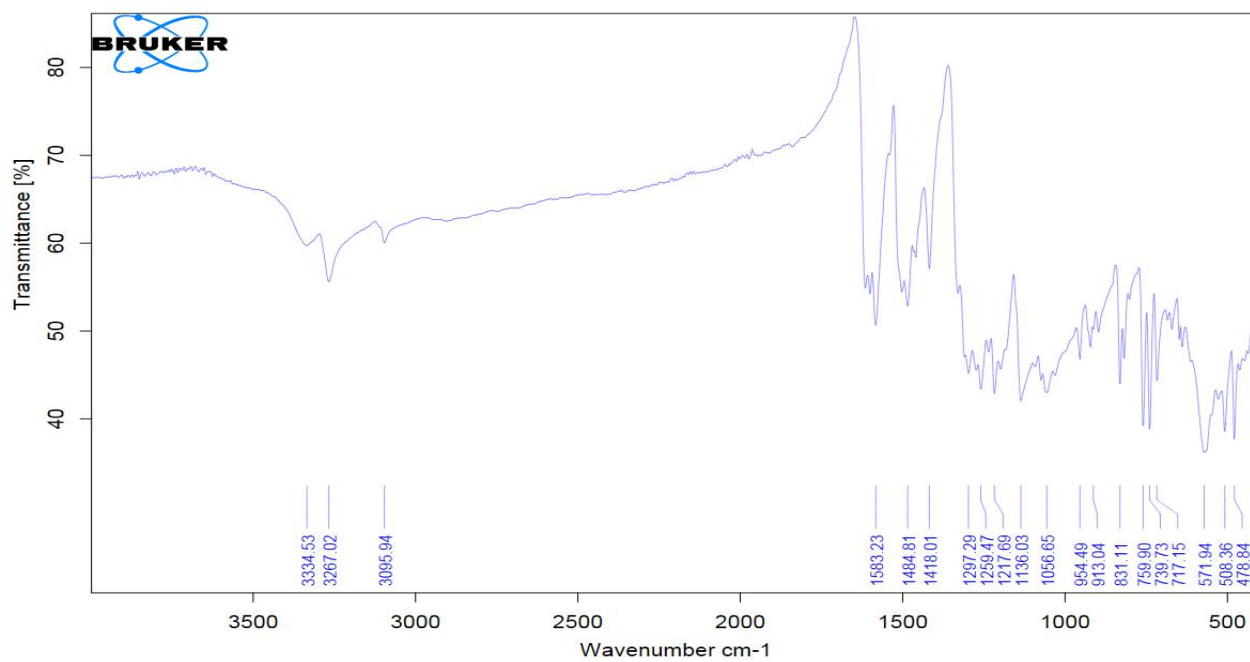

### a. UV-Vis SPECTRUM OF SA5

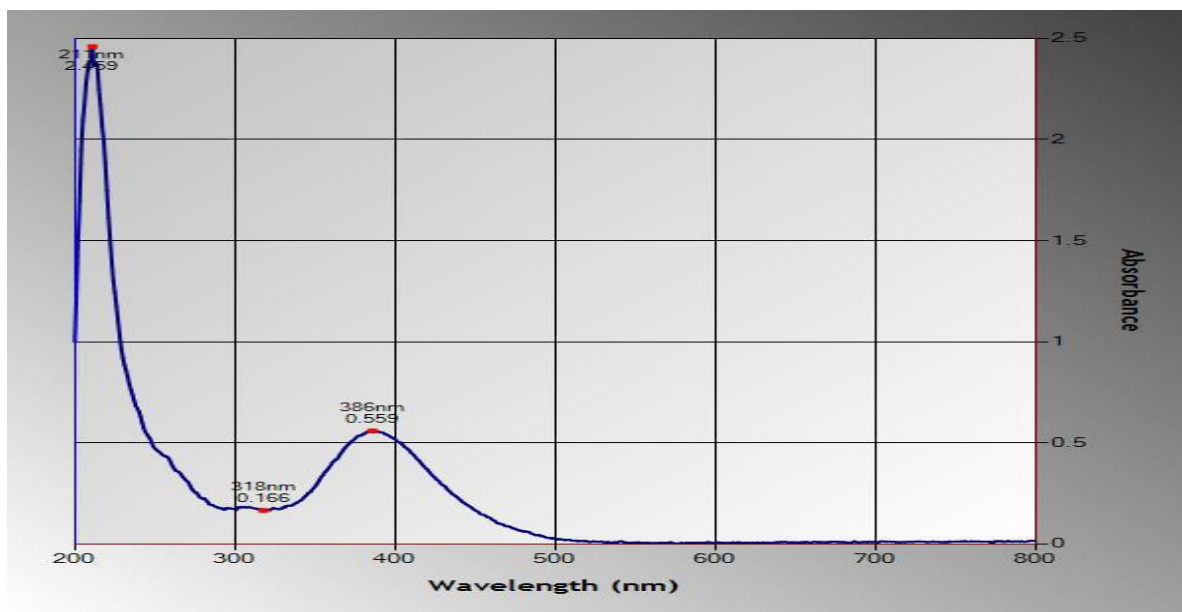

### <sup>1</sup>H NMR SPECTRUM OF DBH6 (compound 6)

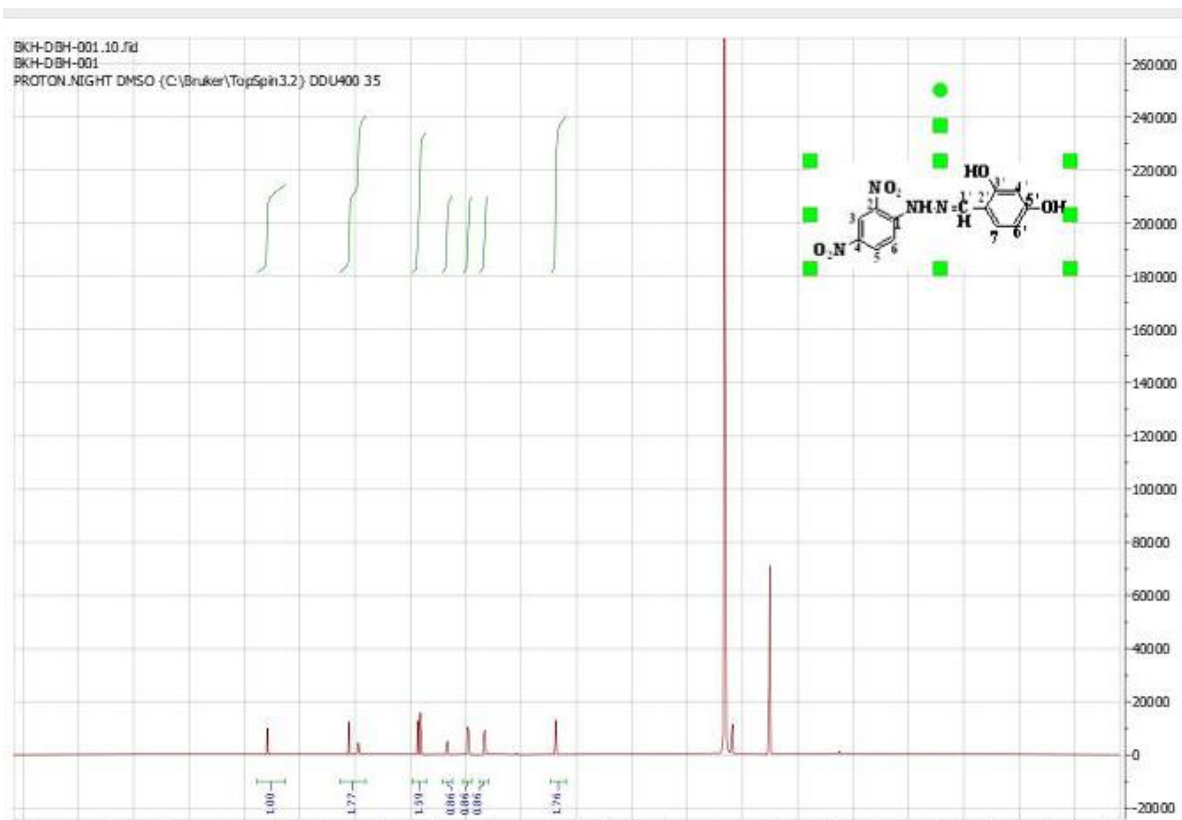

### 13C NMR SPECTRUM OF DBH6 (compound 6)

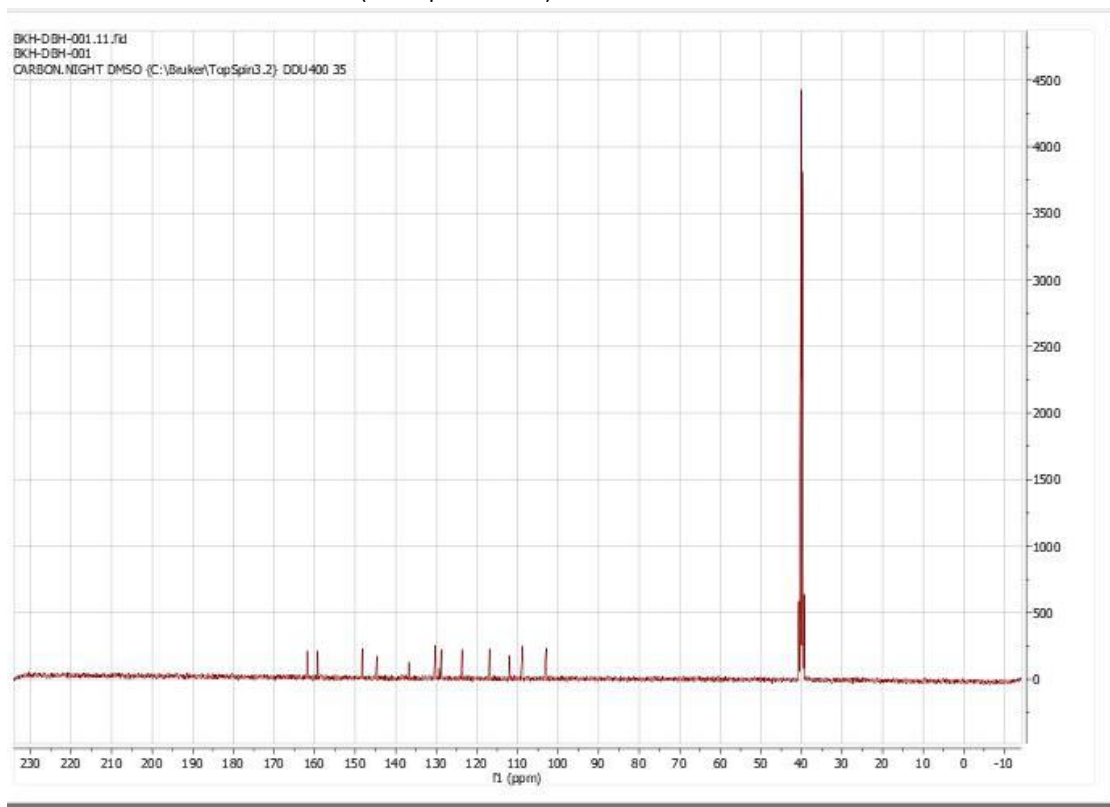

### 6. FTIR SPECTRUM OF DBH6

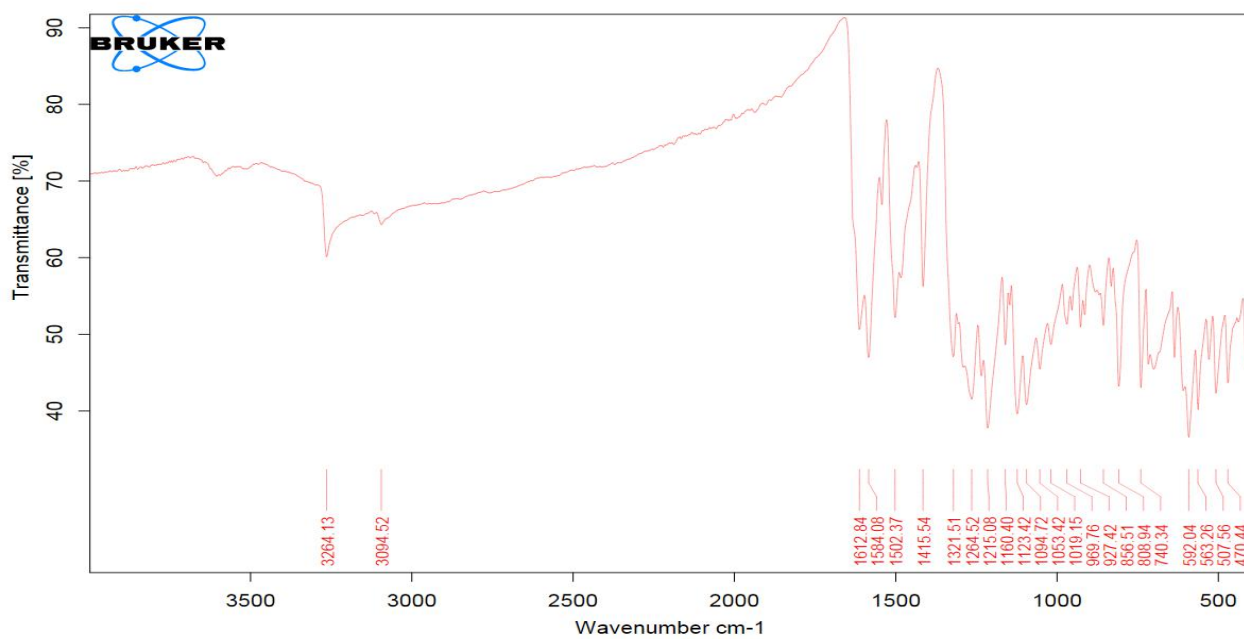

**a. UV-Vis SPECTRUM OF DBH6**

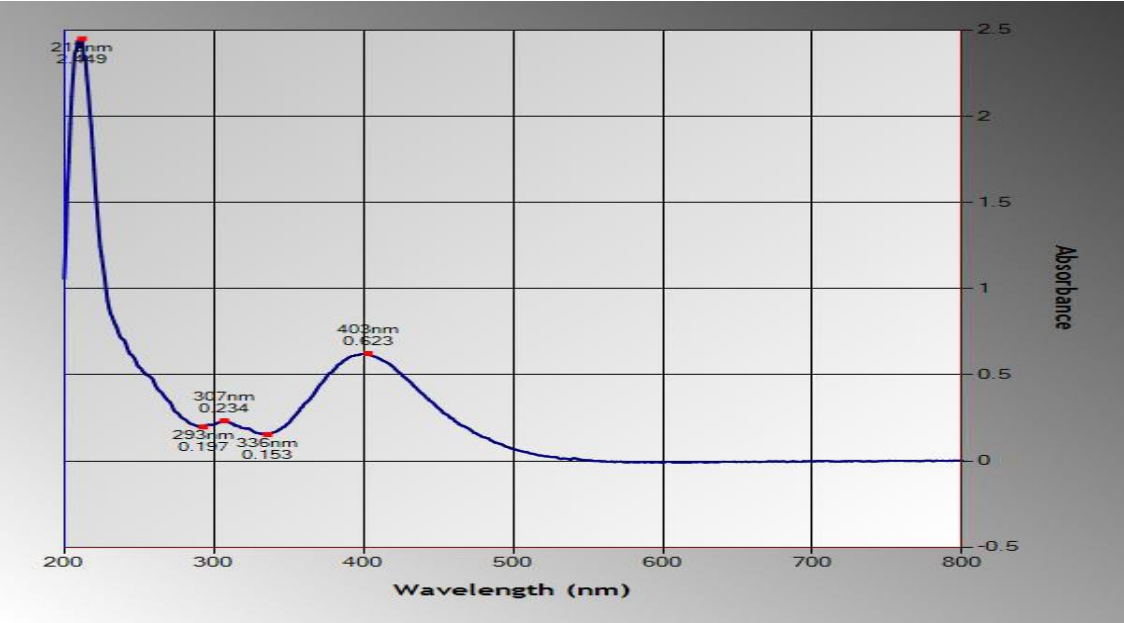

Supplement: f1 [file 2720697.f1.pdf]
